# Supplementary material for: Silicas Chemically Modified with Sulfur-Containing Groups for Separation and Preconcentration of Precious Metals Followed by Spectrometric Determination
Source: MDPI journal article supplement (doi:10.3390/min11050481), 2021-04-30
Supplement: s1 [file s1]

# Supplementary Materials: Silicas Chemically Modified with Sulfur-Containing Groups for Separation and Preconcentration of Precious Metals Followed by Spectrometric Determination

Vladimir Losev, Evgeney Elzuf'ev, Elena Borodina, Olga Buyko \*, Natalya Maznyak and Anatoliy Trofimchuk

**Table S1.** ICP-OES operational conditions.

| Parameter               | Value                   |
|-------------------------|-------------------------|
| RF power                | 1150 W                  |
| Nebulizer gas flow      | 0.7 L·min <sup>-1</sup> |
| Auxiliary gas flow      | 0.5 L·min <sup>-1</sup> |
| Coolant gas flow        | 12 L·min <sup>-1</sup>  |
| Analysis pump rate      | 60 rpm                  |
| Flush pump rate         | 100 rpm                 |
| Sample flush time       | 30 s                    |
| Pump stabilization time | 5 s                     |
| Integration time        | 15 s                    |
| Observation view        | Axial                   |
| Number of repeats       | 3                       |
| Element                 | Emission line, nm       |
| Au                      | 267.595                 |
| Ag                      | 328.068                 |
| Pd                      | 340.458                 |
| Pt                      | 265.945                 |
| Rh                      | 343.489                 |
| Ir                      | 212.681                 |
| Ru                      | 240.272                 |
| Os                      | 225.585                 |

**Table S2.** ICP-MS operational conditions.

| Parameter                       | Value                   |
|---------------------------------|-------------------------|
| Plasma power                    | 1300 W                  |
| Plasma argon flow rate          | 15 L·min <sup>-1</sup>  |
| Auxiliary argon flow rate       | 0.8 L·min <sup>-1</sup> |
| Nebulizer argon flow rate       | 1.0 L·min <sup>-1</sup> |
| Sampler orifice (nickel)        | 1.1 mm                  |
| Skimmer orifice (nickel)        | 0.7 mm                  |
| Acquisition mode                | Peak-jumping            |
| Number of sweeps                | 100                     |
| Dwell time                      | 10 ms                   |
| Acquisition time                | 40 s                    |
| Number of measurements per peak | 3                       |
| Element                         | -m/z                    |
| * Au                            | 197                     |
| Ag                              | 107                     |
| Pd                              | 105                     |
| Pt                              | 195                     |
| Rh                              | 103                     |
| Ir                              | 193                     |
| Ru                              | 101                     |
| Os                              | 189                     |

**Table S3.** FAAS and GFAAS operational conditions.

| Atomizer                                           | Background Correction | Slit Width, mm | Lamp Current, mA, Power Mode | Analytical Range, $\mu\text{g}\cdot\text{mL}^{-1}$ | Analyte (Wavelength, nm) |
|----------------------------------------------------|-----------------------|----------------|------------------------------|----------------------------------------------------|--------------------------|
| Flame:<br>acetylene-air                            | Deuterium             | 0.2            | 25 Continuous                | 0.2–10                                             | Ag (328.0)<br>Au (242.8) |
| Electrothermal:<br>Pyro-coated graphite<br>cuvette | Zeeman                | 0.2            | 50 Pulse                     | 0.002–0.05                                         | Pd (340.4)<br>Pt (265.9) |

**Table S4.** Average content of accompanying elements in analyzed samples.

| Sample                                                | Content of the Element, %(w/w). |        |       |        |         |         |         |        |
|-------------------------------------------------------|---------------------------------|--------|-------|--------|---------|---------|---------|--------|
|                                                       | Ni                              | Cu     | Co    | Fe     | Pb      | Zn      | Se      | As     |
| Sulfide copper-nickel ore (VT-1 GSO no. 929-86)       | 0.8                             | 2.4    | 0.02  | -      | -       | 0.0007  | 0.0035  | -      |
| Nickel concentrate (KN-1 GSO no. 1702-86)             | 5.4*                            | 3.0*   | 0.4   | 40     | -       | -       | -       | -      |
| Copper concentrate (KM-1 GSO no. 1701-86)             | 1.6*                            | 23.6*  | -     | 35     | -       | -       | -       | -      |
| Concentration tailing (ChO-1 GSO no. 1703-86)         | 0.11*                           | 0.070* | -     | -      | -       | -       | -       | -      |
| Matte of ore-thermal smelting (ShT-1 GSO no. 2432-83) | 12.7*                           | 5.1    | 0.5   | 48.5   | -       | -       | -       | -      |
| Copper-nickel feinsein (FShT-42 GSO 9315-2009)        | 41.8*                           | 31.74* | 0.94* | 2.62*  | 0.0136* | 0.0007* | 0.0282* | -      |
| Gold ore<br>SOP ZSR-1-99                              | -                               | 0.01   | -     | 2.5    | 0.027   | 0.01    | --      | 0.25** |
| Gold-bearing flotation concentrate<br>SOP ZSK-3-99    | -                               | -      | -     | 33.5** | -       | -       | -       | 3.82** |

\*certified data provided by PJSC SibtsvetmetNIIproekt (Krasnoyarsk, Russia) [*Standartnye obraztsy—Reference materials*, 2015, No. 3, pp. 30–36. (In Russian)], \*\*certified data provided by PJSC Polyus (Krasnoyarsk, Russia), - there is no data.

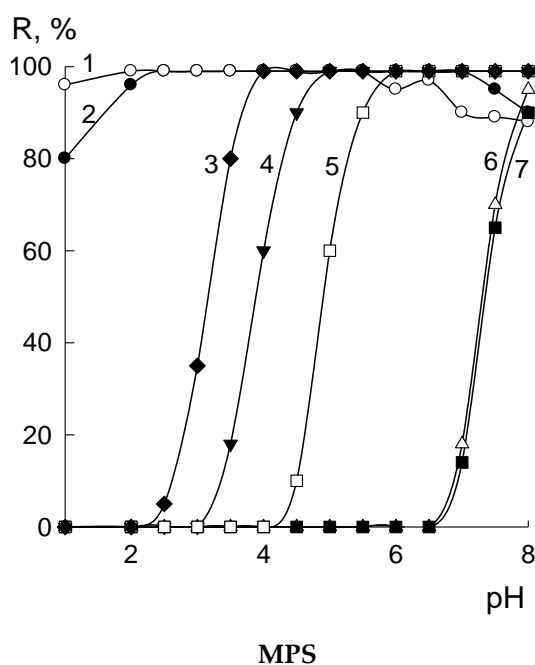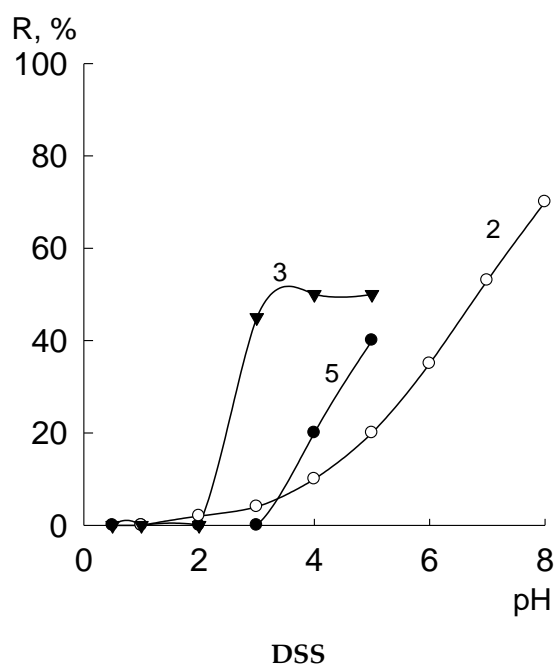

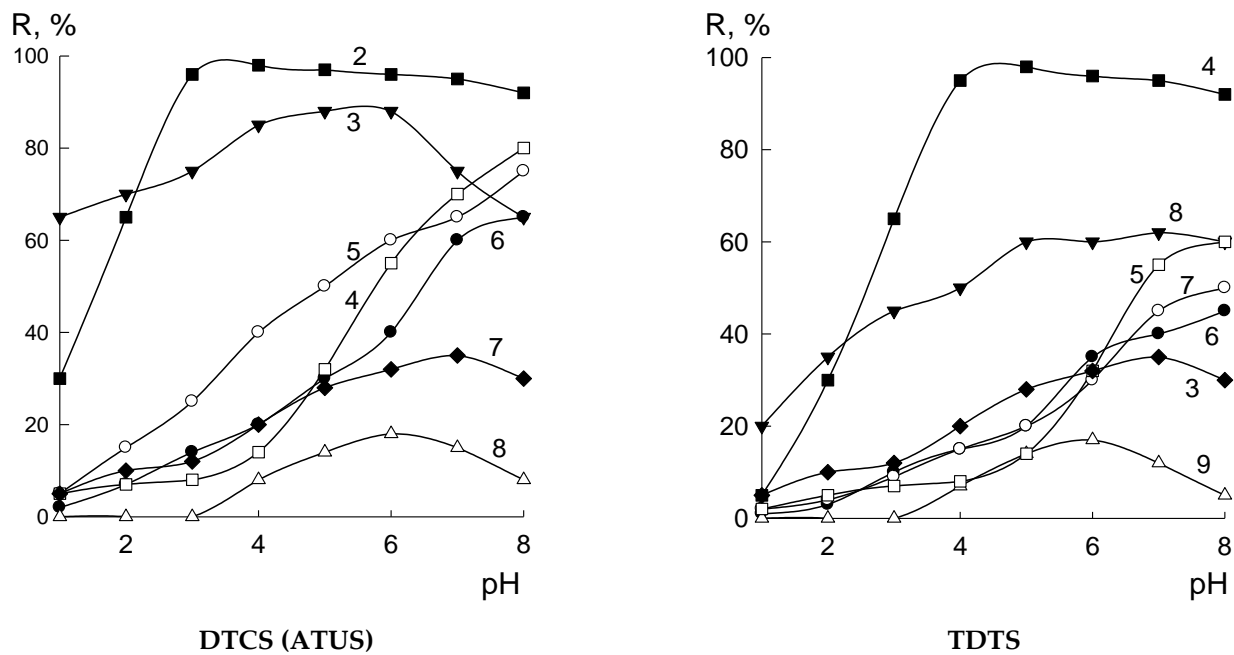

**Figure S1.** Extraction of Bi(III) (1); Cu(II) (2); Pb(II) (3); Cd(II) (4); Zn(II) (5); Co(II) (6); Ni(II) (7), Fe(III) (8); Fe(II) (9) with MPS, DSS, DTCS, and TDTS adsorbents vs. pH ( $C_{Me} = 10 \mu\text{g}\cdot\text{mL}^{-1}$ ,  $V = 10 \text{ mL}$ ,  $0.1 \text{ g}$  of adsorbent).
